# Supplementary material
Source: Research Square preprint supplement (doi:10.21203/rs.3.rs-9282981/v1)
Supplement: Supplementary file 1 [file 6414b2eb90cc945f9b3345bf.docx]

**Supplemental material**

Figure S1. Distribution and composition of repetitive elements in the *T. marneffei* B33c genome.

Figure S2. Functional annotation and classification of predicted protein-coding genes in *T. marneffei* strain B33c.

Notes：(A) COG functional classification, with major categories related to metabolism.(B) GO annotation summary (BP/CC/MF), with dominant terms including metabolic process and catalytic activity.(C) KEGG pathway distribution, largely assigned to carbohydrate, amino acid, and energy metabolism.

Figure S3. Additional dot plots and ribbon plots for interspecific and intraspecific synteny and structural variation in *Talaromyces*.

Notes：(A–C) Dot plots showing genome-wide alignments between *T. marneffei* B33c and related species *(T. funiculosus, T. stollii,* and *T. ruber*).(D–I) Dot plots of pairwise genome alignments between B33c and six representative *T. marneffei* isolates: ATCC18224 (D), 11CN-03-130 (E), 11CN-20-091 (F), TM4 (G), PM1 (H), and GZ8H79 (I).(J–L) Linear ribbon plots comparing the B33c reference with isolates 11CN-20-091 (J), TM4 (K), and PM1 (L), highlighting macrosynteny and structural polymorphisms. Ribbon colors indicate collinear blocks, inversions, and translocations as shown in the legend.

Figure S4. Functional annotation of core and isolate-/species-specific gene families in *T. marneffei*.

Notes: (A–B) GO (A) and KEGG (B) enrichment of species-level core orthogroups defined by OrthoFinder clustering. (C–D) Functional characterization of *T. marneffei*–specific orthogroups, including GO enrichment (C) and category distribution as indicated (D). (E–F) GO (E) and KEGG (F) enrichment of B33c-specific orthogroups. (G–H) GO (G) and KEGG (H) enrichment of ATCC 18224-specific orthogroups.

Table S1. Sequencing platforms, library types, and data statistics for *T.marneffei* strain B33c.

Table S2. Summary of repetitive elements and non-coding RNAs in the *T.marneffei* B33c genome.

Table S3. Gene structure features of the *T. marneffei* B33c genome.

Table S4. Functional annotation of predicted protein-coding genes in the *T. marneffei* B33c genome.
