# Supplementary material
Source: Research Square preprint supplement (doi:10.21203/rs.3.rs-9282981/v1)
Supplement: Supplementary file 2 [file 664d989680f2a7f22957f123.docx]

**Table S1.** **Sequencing platforms, library types, and data statistics for *T.marneffei* strain B33c.**

| **Platform/**  **Technology** | **Library type** | **Data yield (Gb)** | **Read count (million )** | **Average length (bp)** | **N50 (bp)** | **Max length (bp)** | **Primary application** |
| --- | --- | --- | --- | --- | --- | --- | --- |
| **PacBio Sequel IIe** | HiFi long reads | 6.40 | 0.49 | 13,059 | 13,500 | 348,094 | High-accuracy contig assembly |
| **Oxford Nanopore PromethION** | long-reads | 8.60 | 3.17 | 2,717 | 4,532 | 224,937 | Gap resolution and SV validation |
| **DNBSEQ-T7(MGI Tech)** | Hi-C(PE150, Arima-HiC+) | 4.54 | 16.50 | 150 | — | — | Chromosome scaffolding |

| **Type** | **Category** | **Copy number** | **Total length（bp）** | **Average**  **length （bp）** | **Genome proportion（%）** |
| --- | --- | --- | --- | --- | --- |
| **Interspersed Repeats** | DNA transposons | 1,051 | 413,286 | 393 | 1.467 |
|  | LTR retrotransposons | 961 | 330,912 | 344 | 1.175 |
|  | LINE | 477 | 270,237 | 567 | 0.959 |
|  | SINE | 9 | 513 | 57 | 0.002 |
|  | Rolling-circle (RC) transposons | 66 | 4,641 | 70 | 0.017 |
|  | scRNA | 0 | 0 | 0 | 0 |
|  | Unclassified | 1,411 | 439,789 | 312 | 1.561 |
|  | Total Interspersed repeats | 3,975 | 1,459,378 | 367 | 5.181 |
| **Tandem Repeats** | Tandem Repeats | 2,584 | 172,916 | 1 ~ 1,084 | 0.614 |
|  | Minisatellite DNA | 1,610 | 106,977 | 10 ~ 60 | 0.38 |
|  | Microsatellite DNA | 491 | 24,187 | 2 ~ 6 | 0.086 |
|  | Total Tandem Repeats | 4,685 | 304,080 | — | 1.08 |
| **Non-coding RNAs** | Transfer RNA (tRNA) | 98 | 9,117 | 93 | 0.032 |
|  | Ribosomal RNA (rRNA) | 26 | 8,039 | 309 | 0.029 |
|  | Small RNA (sRNA) | 3 | 659 | 220 | 0.002 |
|  | Small nuclear RNA (snRNA) | 13 | 1,778 | 137 | 0.006 |
|  | MicroRNA (miRNA) | 0 | 0 | 0 | 0 |
|  | Total ncRNAs | 140 | 19,593 | — | 0.069 |

**Table S2. Summary of repetitive elements and non-coding RNAs in the *T.marneffei* B33c genome.**

* For tandem repeats, the fourth column represents repeat size range (bp) instead of average length

**Table S3.** **Gene structure features of the *T. marneffei* B33c genome.**

| **Features type** | **Features** | **Value** |
| --- | --- | --- |
| **Gene features** | Total number of genes | 9,635 |
|  | Total gene length (bp) | 17,011,444 |
|  | Average gene length (bp) | 1,765 |
|  | Percentage of genome occupied by genes (%) | 60.46 |
| **Exon features** | Total number of exons | 30,803 |
|  | Total exon length (bp) | 15,406,143 |
|  | Average exon length (bp) | 500 |
|  | Average number of exons per gene | 3 |
| **Intron features** | Total number of introns | 21,168 |
|  | Total intron length (bp) | 1,605,301 |
|  | Average intron length (bp) | 75.83 |

**Table S4.** **Functional annotation of predicted protein-coding genes in the *T. marneffei* B33c genome.**

| **Database** | **Number of genes** | **Percentage(%)** |
| --- | --- | --- |
| **NR** | 9,614 | 99.78 |
| **GO** | 3,716 | 38.57 |
| **COG** | 6,197 | 64.32 |
| **KEGG** | 4,091 | 42.46 |
| **Swiss-Prot** | 6,025 | 62.53 |
| **Pfam** | 7,440 | 77.22 |
| **Total annotated genes** | 9,614 | 99.78 |
