# Supplementary material
Source: Research Square preprint supplement (doi:10.21203/rs.3.rs-9282981/v1)
Supplement: Supplementary file 3 [file 91e6a888945284e1b872b648.docx]

**Figure S1. Distribution and composition of repetitive elements in the *T. marneffei* B33c genome.**


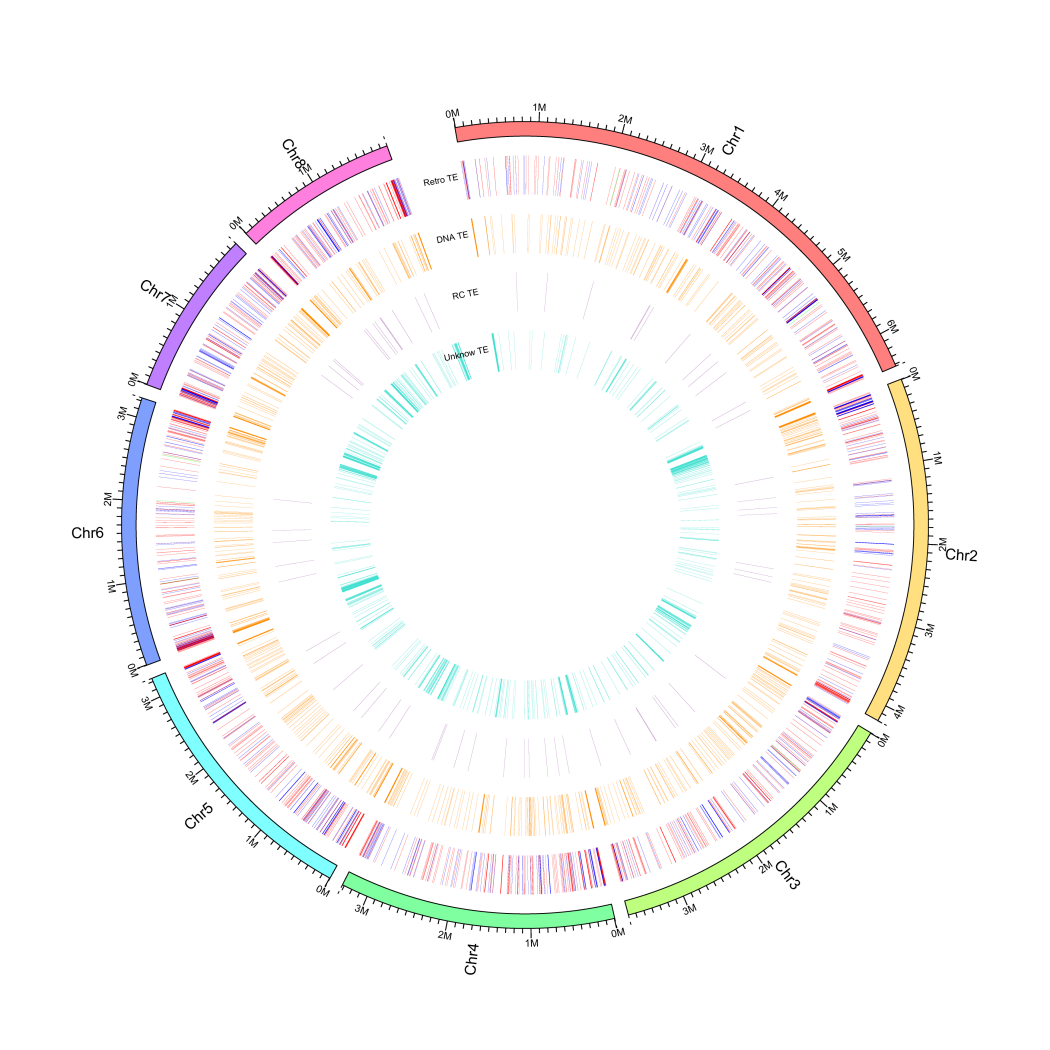


**Figure S2. Functional annotation and classification of predicted protein-coding genes in *T. marneffei* strain B33c.**


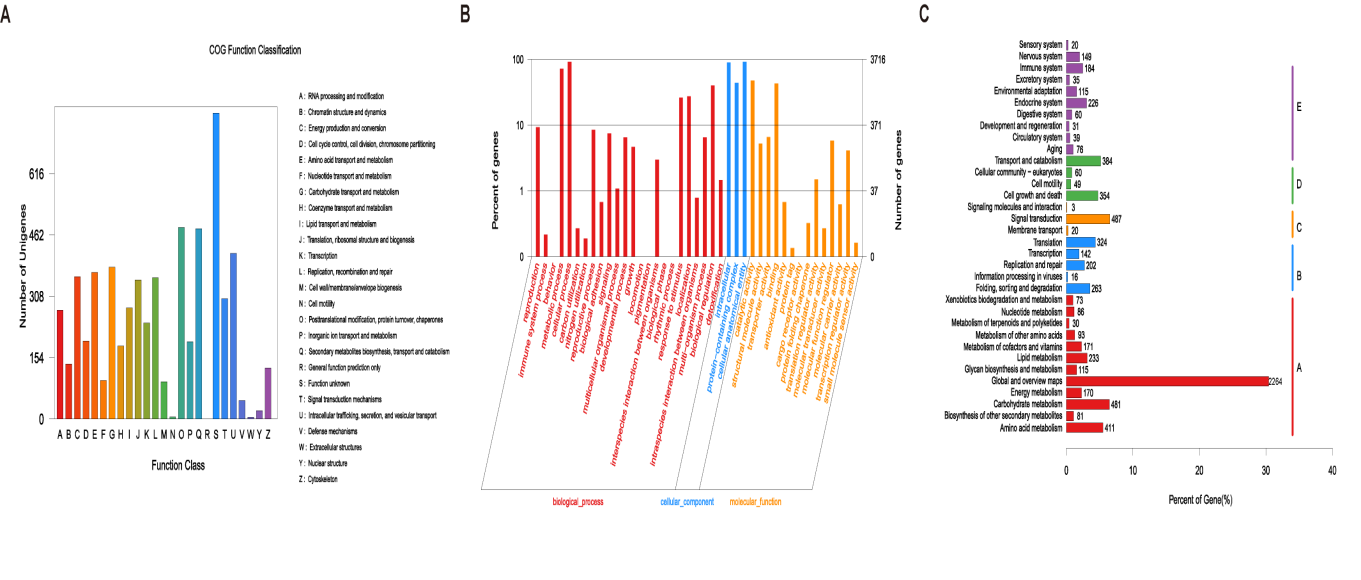


Notes：(A) COG functional classification, with major categories related to metabolism.(B) GO annotation summary (BP/CC/MF), with dominant terms including metabolic process and catalytic activity.(C) KEGG pathway distribution, largely assigned to carbohydrate, amino acid, and energy metabolism.

**Figure S3. Additional dot plots and ribbon plots for interspecific and intraspecific synteny and structural variation in *Talaromyces*.**


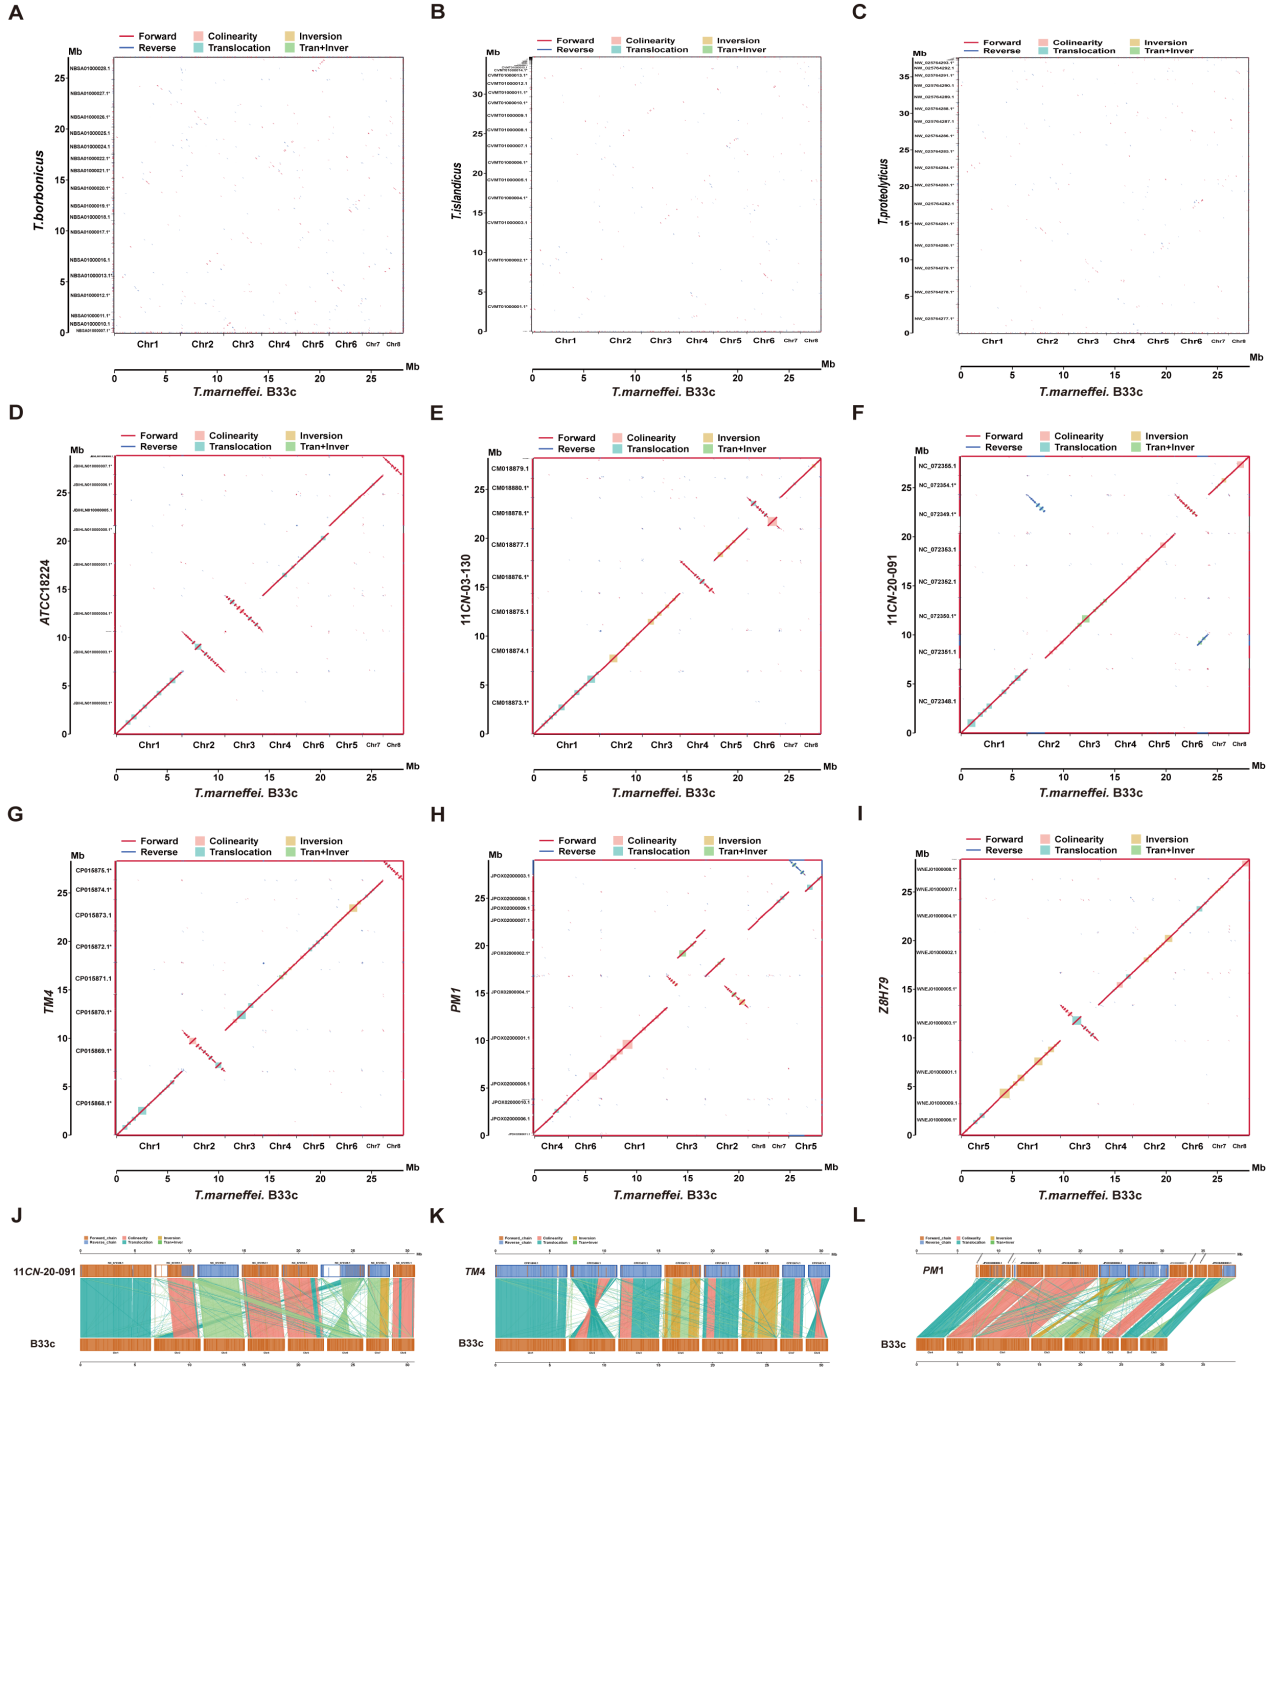


Notes：(A–C) Dot plots showing genome-wide alignments between *T. marneffei* B33c and related species (*T. funiculosus*, *T. stollii*, and *T. ruber*).(D–I) Dot plots of pairwise genome alignments between B33c and six representative *T. marneffei* isolates: ATCC18224 (D), 11CN-03-130 (E), 11CN-20-091 (F), TM4 (G), PM1 (H), and GZ8H79 (I).(J–L) Linear ribbon plots comparing the B33c reference with isolates 11CN-20-091 (J), TM4 (K), and PM1 (L), highlighting macrosynteny and structural polymorphisms. Ribbon colors indicate collinear blocks, inversions, and translocations as shown in the legend.

**Figure S4. Functional annotation of core and isolate-/species-specific gene families in *T. marneffei*.**


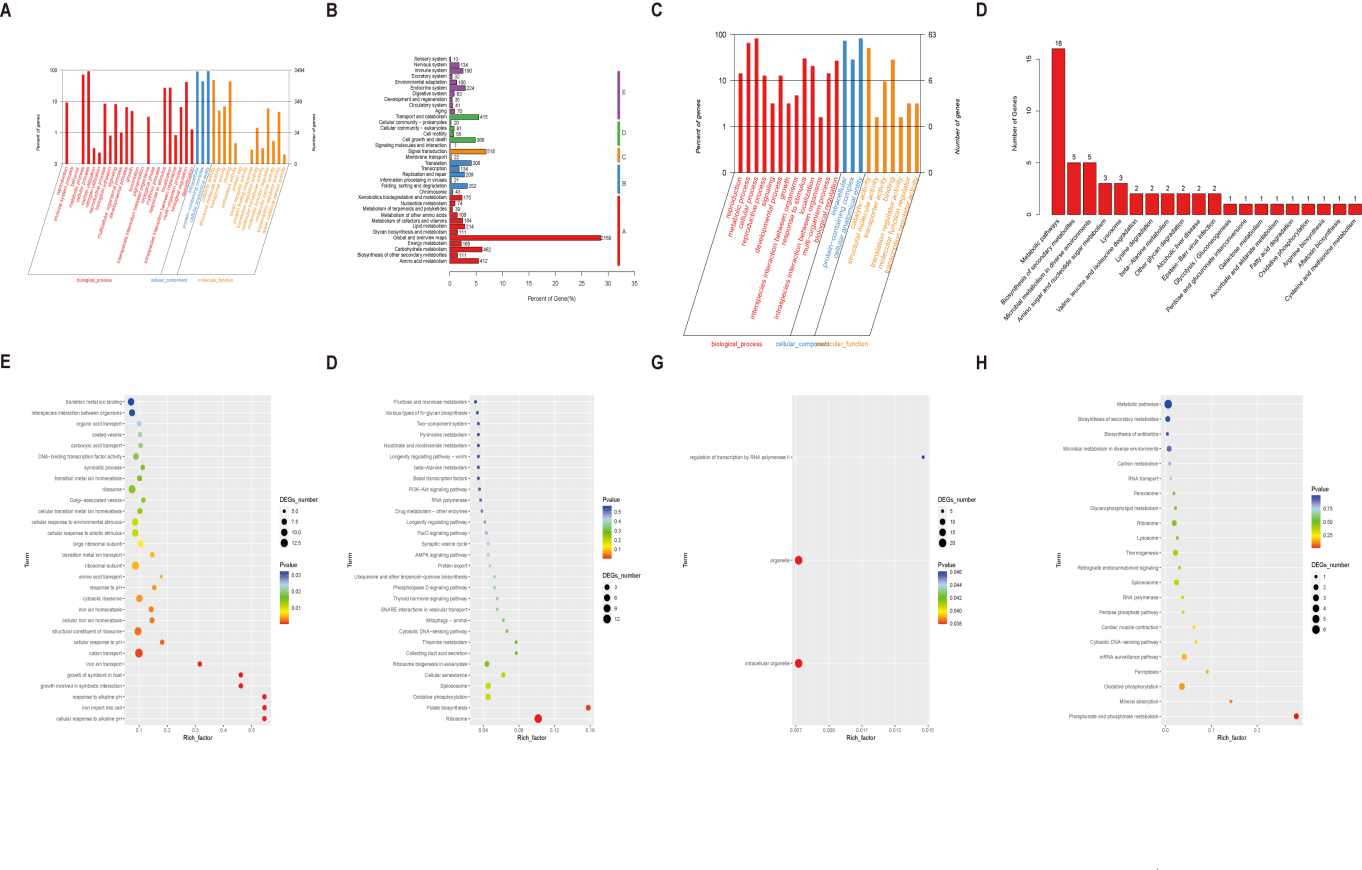


Notes: (A–B) GO (A) and KEGG (B) enrichment of species-level core orthogroups defined by OrthoFinder clustering. (C–D) Functional characterization of *T. marneffei*–specific orthogroups, including GO enrichment (C) and category distribution as indicated (D). (E–F) GO (E) and KEGG (F) enrichment of B33c-specific orthogroups. (G–H) GO (G) and KEGG (H) enrichment of ATCC 18224-specific orthogroups.
